# Supplementary material for: Dense granule trafficking in Toxoplasma gondii requires a unique class 27 myosin and actin filaments
Source: PubMed Central journal article supplement — Mol Biol Cell. 2016 Jul 1;27(13):2080–9. doi: 10.1091/mbc.E15-12-0824 (PMC4927281; doi:10.1091/mbc.e15-12-0824), 2016-07-01
Supplement: supp_E15-12-0824v1_CombinedSupMats.pdf [file supp_E15-12-0824v1_CombinedSupMats.pdf]

# Supplemental Materials

*Molecular Biology of the Cell*

Heaslip et al.

## Supplemental File.

### Supplemental Figure Legends.

**Figure S1. SAG1 $\Delta$ GPI-GFP and anti-Gra6 co-localize to the dense granules.** Fluorescence image of an extracellular parasite showing co-localization between SAG1 $\Delta$ GPI-GFP and dense granule protein anti-Gra6. Right panels are 3x magnification of area in the white box. *Green*: SAG1 $\Delta$ GPI-GFP. *Red*: anti-Gra6. *Cyan*: anti-GAP45 to highlight the parasite periphery.

**Figure S2. Analysis of dense granule motions using MSD.** (A) Fluorescence image of parasites with GFP labeled dense granules (green) and mCherryFP labeled microtubules (red). Yellow arrow indicates region of the parasite used to make Kymograph. Kymograph, which depicts the spatial position (x-axis) along the trajectory of a granule over time (y-axis), shows a dense granule moving bidirectionally towards the apical (A) and then basal (B) end of the parasite. mCherryFP-Tubulin expression allows the unambiguous identification of the parasites apical end (white arrow heads). (B) Example trajectories and MSD plots on a log-log axes (large graphs) and linear axes (insets) for stationary (red), diffusive-like (blue) and directed (green) dense granule trajectories. Diffusive exponent,  $\alpha$ , which is the slope of the log-log MSD indicated. (C) Bar chart indicates directionality of dense granule motions.

**Figure S3. Creation and analysis of *LoxP-Actin* parasite lines.** (A) Strategy for creating *LoxP-Actin* and conditional  $\Delta Actin$  parasite lines. Adapted from Andenmatten et al 2013. (B) Fluorescence image of untreated and rapamycin treated *LoxP-Actin* parasites. 20% of vacuoles contained at least one parasite (white arrow head) that contain no dense granules. *Green*: YFP. *Red*: SAG1 $\Delta$ GPI-mCherryFP. *Cyan*: anti-actin.

**Figure S4. Protein sequence analysis of TgMyoF.** (A) Alignment of TgMyoF (EPT25279.1) with Mouse Myosin Va (NP\_034994.2), Myosin VI (Q9UM54.4), Myosin VII (XP\_644171.1), Myosin X (CAB56466.2) motor domains. 3 unique inserts in TgMyoF motor domain are highlighted with an orange box. Unique insert in Myosin VI (insert 1) is highlighted with a blue box. P-loop, Loop1 and Switch 1, conserved sequences that determine the kinetics of nucleotide binding to and release from the motor's active site, are highlighted with red boxes. NCBI accession numbers are shown in brackets. (B) Alignment of the IQ motifs of TgMyoF and Myosin Va. Each IQ motifs are highlighted with a green box. (C) Prediction of coiled-coiled regions in TgMyoF and Myosin Va. Green, blue and red lines indicates scan region of 14, 21 and 28 residues respectively.

**Figure S5. Creation of *LoxP-TgMyoF*.** Schematic of TgMyoF genomic locus in parental and *LoxP-TgMyoF* parasites. Primer binding sites (F1/F2 and R1/R2) are indicated. (B) Genomic PCR analysis of parental and *LoxP-TgMyoF* parasites lines. (C) Fluorescence image of control and rapamycin treated *LoxP-TgMyoF* parasites indicating accumulation of the microneme protein AMA-1 in the residual body upon loss of functional TgMyoF. Residual body indicated with \*. *Green*: TgMyoF-EmeraldFP. *Red*: anti-GAP45 highlighted parasite periphery. *Cyan*: anti-AMA-1 for visualizing the micronemes.

**Figure S6. eGFP-TgMyoF localizes to the parasite cytosol.** Fluorescence image of intracellular parasites ectopically expressing eGFP-TgMyoF. *Green*: eGFP-TgMyoF. *Red*: anti-GAP45 to highlight parasite periphery.

**Figure S7. *TgMyoF-ΔCT* parasites have a replication defect.** (A) Immunofluorescence images of parental (top), *LoxP-TgMyoF* (middle) and *TgMyoF-ΔCT/apicoplast* positive (bottom) parasites 40 hours after host cell invasion. Parasites were stained with anti-GFP/Alexa 488 conjugate (left), anti-HSP60 as a marker for the apicoplast (pink) and IMC1 (blue) to highlight the parasite periphery (right). (B) Comparison of the intracellular growth of parental, *LoxP-TgMyoF*, *TgMyoF-ΔCT/apicoplast*-positive and *TgMyoF-ΔCT/apicoplast*-negative parasite strains 40 hours after infection. In both parental and *LoxP-TgMyoF* parasite lines 60% of parasite vacuoles contain 32 or more parasites. Both *TgMyoF-ΔCT* populations have a severe replication defect and vacuoles containing  $\geq 32$  parasites were never observed, and less than 10% contained 16 parasites/vacuole. In each case ~25% of vacuoles contained “odd” numbers of parasites (i.e. – parasite number per vacuole was not an integral to the power of 2) and are disorganized within the vacuole (A; bottom panel). Thus the replication defect was equally severe in *TgMyoF-ΔCT/apicoplast positive* and *TgMyoF-ΔCT/apicoplast negative* parasites indicating that loss of apicoplast inheritance contributes to but cannot fully account for the replication defect observed in the *TgMyoF-ΔCT* parasites. Thus, other defects associated with loss of TgMyoF, including but not limited to dense granule trafficking likely also contributes to the lethality of this parasite line.

### Supplemental Movie Legends.

**Movie S1.** Dense granule dynamics in intracellular *T. gondii* parasites expressing SAG1ΔGPI-GFP. Imaging speed 10fps, playback 6x real time.

**Movie S2.** Dense granule dynamics in intracellular *T. gondii* parasites expressing SAG1ΔGPI-GFP. Microtubules were depolymerized with oryzalin (*left*), actin was depolymerized with cytochalasin D (*middle*) and actin was stabilized with jasplakinolide (*right*). Imaging speed 10fps, playback 6x real time.

**Movie S3.** Dense granule dynamics in untreated (*left*) and rapamycin (*right*) treated *LoxP-Actin* parasites expressing SAG1ΔGPI-mCherryFP. Imaging speed 10fps, playback 6x real time.

**Movie S4.** Dense granule dynamics in untreated (*left*) and rapamycin (*right*) treated *LoxP-TgMyoF* parasites expressing SAG1ΔGPI-mCherryFP. Imaging speed 10fps, playback 6x real time.

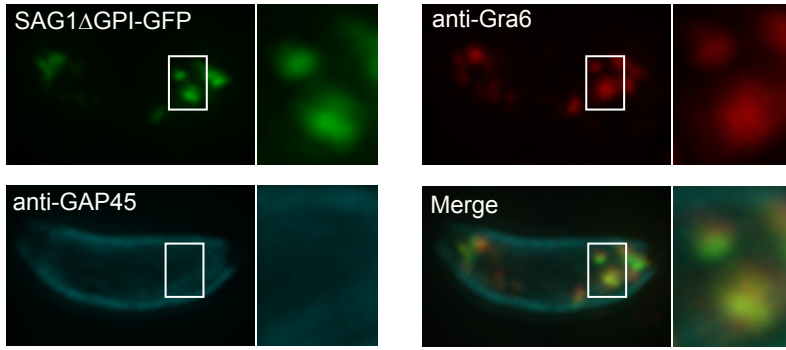

Figure S1

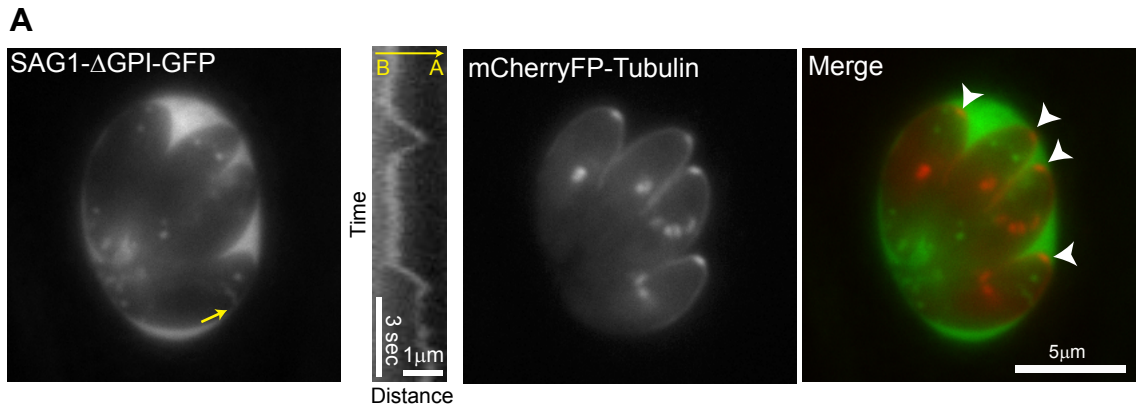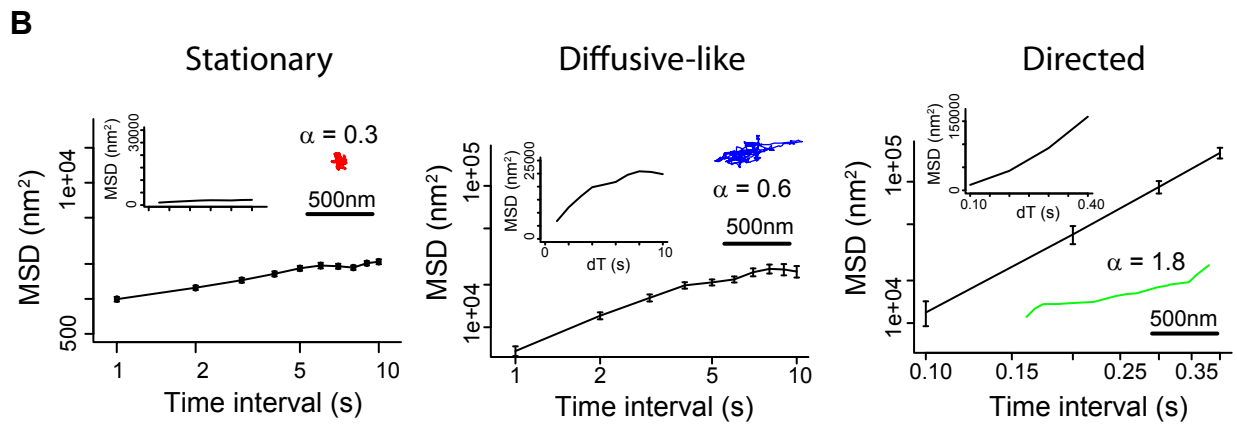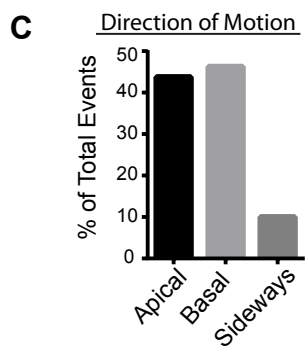

Figure S2

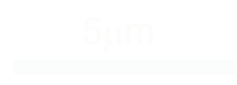

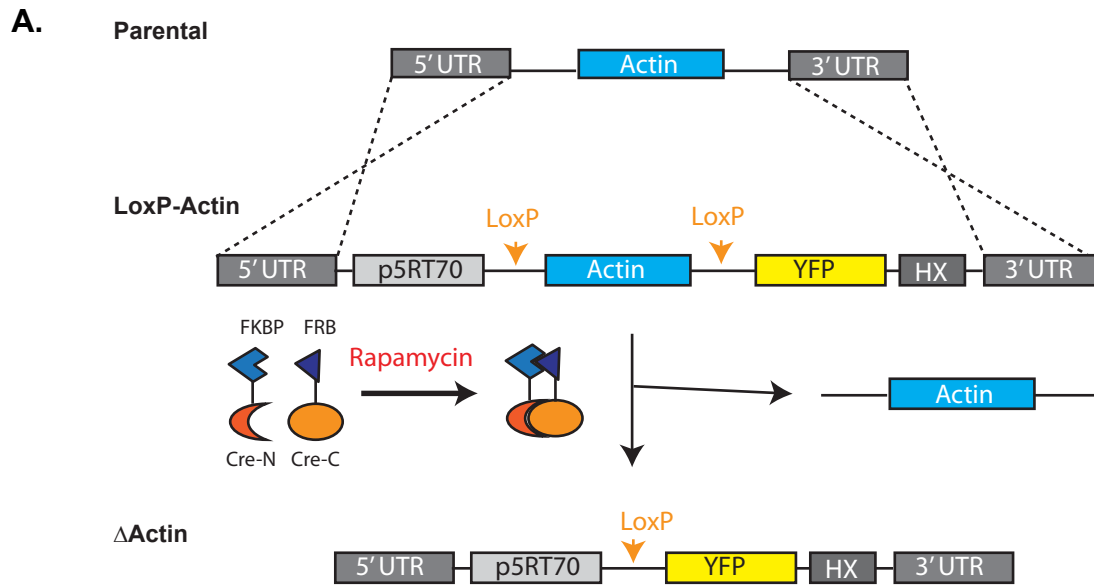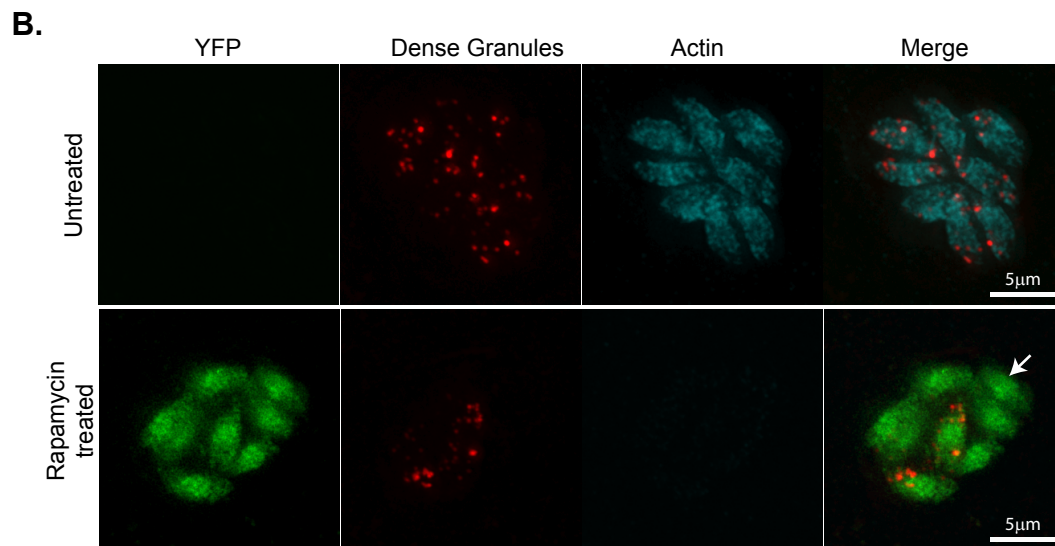

Figure S3

**A**

```

Myosin_VII -----MEDD-----DTLN-----GEYFQP----- 14
Myosin_X -----MDSFFPEGARVWLRENGQHFSTVNSCAEGVVVFQTDYGVFTYKQSTI 49
Myosin_VI ----MEDGKPVWAPHPTDGFQMGNIVDIGPDSLTIIEPLNQKGTFLALINQVFPAAEDS- 55
Myosin_Va -MAASELYTKFARVWI PDPEEVWKSSELLKDYKPGD----KVLHLLHLEEGKDLEYRLDPK 55
TgMyoF MTASSADGASAPGGGDPGEEEVRCVAVGTKIYVPDAADVWRTAEVVKIQEDGSLTARVDAD 60

```

```

Myosin_VII -----VEDMITLPILTEESLLLNLKMRYYK-KEIYTYT 46
Myosin_X TNQKVT-----AMHPLHEEGVDDMASLAEHLGVAIMYNLFQRYKR-NQIYTYI 96
Myosin_VI -----KKDVEDNCSLMYLNEATLLHNKVRYSK-DRIYTYV 90
Myosin_Va TGELPH-----LRNPDILVGENDLTALSYLHEPAVLHNLRVRFIDSKLIYTYC 103
TgMyoF NELVQLKKNDIWYLCNTDVWNTTGLSAPTDLTMLTHLHEAAVLDSLNLRFDI-DEIYTF 119

```

Insert A (22aa)

```

Myosin_VII GSILVAVNPYEILP-IYTADIVKSYFAKSRNML-----PHIF 83
Myosin_X GSIIASVNPYQPIAGLYERATMEEYSRCHLGELP-----PHIF 134
Myosin_VI ANILIAVNPYFDIPKIYSSEAIKSYQGKSLGTRP-----PHVF 128
Myosin_Va GIVLVAINPYEQLP-IYGEDIINAYSGQNMGMMD-----PHIF 140
TgMyoF GPILIAVNPYFKQITGLYDMKQLVRYIASELPMGPVPSSSSGSSSNAPVALPISRQPHVF 179

```

P-loop

Loop 1

```

Myosin_VII AVSDAAFTNMIEEGKNQSIISGESGAGKTESTKLIQYLAARTN-----RHSQVE 134
Myosin_X AIANECYRCLWKRHDNQCVLISGESGAGKTESTKLIKFLSVISQQTLDLGLQEKTSVVE 194
Myosin_VI AIADKAFRDMKVLKMSQSIIVSGESGAGKTENTKFLRYLTSYSG-----TGQDID 179
Myosin_Va AVAAEEAYKQMARDERNQSIIVSGESGAGKTVSAKYAMRYFATVSG-----SASEANVE 193
TgMyoF ASSSAAYQGMCKNEKQSQITILISGESGAGKTESTKFMKFLACAGSED-----LERSQVE 234

```

Switch 1

Insert B (9aa)

```

Myosin_VII QMIVESSPILEAFGNAKTIRNNSSRFGKFIIEIQFNF-----EGHISGARIINYLL 185
Myosin_X QAILQSSPIMEAFGNAKTIVYNNSSRFGK FVQLNICQ-----QGNIQGGRIVDYLL 245
Myosin_VI DRIVEANPLLEAFGNAKTIVRNNSSRFGK FVEIHFNE-----KSSVVGGFVSHYLL 230
Myosin_Va EKVLASNPIMESIGNAKTTRNDNSSRFGKYIEIGFDK-----RYRIIGANMRTYLL 244
TgMyoF AQVLESNPLLEAFGNARTLRNDNSSRFGK FIELQFQISKAKRMSGNRGRLCGARIQTYLL 294

```

Insert C (22aa)

```

Myosin_VII EKSRIHQASSERNYHIFYQLLAGASDELKE-----KLKLGEP 223
Myosin_X EKNRVVRRIPGERNYHIFYALLAGLDQEERE-----EFYLSLP 283
Myosin_VI EKSRIQVQGEERNYHIFYRLCAGASEDIRE-----KLHLSSP 268
Myosin_Va EKSrvVFQAEERNYHIFYQLCASAKLPEFK-----MLRLGNA 282
TgMyoF EKVRVCDQOEGERNYHIFYQLCAAAEAAAQTGGIYYFSPKFRKAADAKAQEMDMSLFEP 354

```

Insert 1

```

Myosin_VII -EDYHYLSQ-----SGCIRIENINDVEDFEHVKYAMNVL 256
Myosin_X -ENYHYLNQ-----SGCTEDKTI SDQESFRQVITAMEVM 316
Myosin_VI -DNFRYLNRGCTRYFANKETDKQILQNRKSPEYLKAGSMKDPDLLDDHGDFIRMCTAMKKI 327
Myosin_Va -DSFHYTEKQ-----GGSPMIEGVDDAKEMAHTROACTLL 315
TgMyoF RDKFKYLTK-----SSCHQLQGVDDCEEFEFESTL FAMQTV 388

```

```

Myosin_VII GLPEDKQFTIFSI VSAVLHIGNLKFKEKSEKTQGAEGSEVSNK--DTLKI I AQLLSVDPVK 314
Myosin_X QFSKEEVREVLRLLAGILHLGNIEFIT-----AGGAQIPFK--TALGRSADLLGLDPTQ 368
Myosin_VI GLDDEEKLDLFRVAVGLHHLGNIDFEEAG--STSGGCNLKNKSAQSLEYCAELLGLDQDD 385
Myosin_Va GISESYQMGIFRILAGILHLGNVGFASRD----SDSCTIPPK-HEPLTIFCDLMGV DYE 370
TgMyoF GISPEEQMSILSVVAVLCLGNVSFETPK--ANSEGSQVAASCTEYVCKACRLLGVQREA 446

```

Myosin\_VII LETCLTIRHVLI-----RGQNFVIPLKVNEAEDTRDSLAKALYGNVFNWLVVFINS---- 365  
 Myosin\_X LTDALTQRSMIL-----RGEEILTPLSVQQAVDSRDSLAMALYARCFEWWIKKINS---- 419  
 Myosin\_VI LRVSLTTRVMLTTAGGTKGTVIKVPKVEQANNARDALAKTVYSHLFDHVVNRVN----- 440  
 Myosin\_Va MCHWLCHRKLAT-----ATETYIKPI SKLQATNARDALAKHIYAKLFNWIVDHVNQ---- 421  
 TgMyoF LQEAMCYRTIKT-----AHESYRKPLKTD EAWEMKDALCRALYGCLFLQVVAKTNASIGY 501  
 : : \* : \* : \* : \* : \* : \* : \*

Myosin\_VII --KIHKPQKNSTFIGVLDIFGFENFKKNSFEQFCINFANEKLOQHFNQHFQLEQEEYEK 423  
 Myosin\_X --RIKG-KDDFKSIGILDIFGFENFEVNHFEQFNINYANEKLOEYFNKHIFSLQLEYSR 476  
 Myosin\_VI --QCFPFETSSYFIGVLDIAGFEYFEHNSFEQFCINYCNEKLOQFFNERILKEEQELYQK 498  
 Myosin\_Va --ALHSAVKQHSFIGVLDIYGFETFEINSFEQFCINYANEKLOQQFNMHVFKLEQEEYMK 479  
 TgMyoF LKEVQSADDDLLFCGVLDIFGFECFQFNSFEQLCINFTNERLQNFNTFVFKCEEELYRA 561  
 \* : \* \* \* \* : \* \* \* : \* : \* \* \* : \* : \* : \*

Myosin\_VII EKINWSKIVYNDNQECLDLIEKRPLGILSLLDEESRFPQATDLTYLDKLTNHEKH-PYY 482  
 Myosin\_X EGLVWEDIDWIDNGECLDLIEKK-LRLLALINEESHFPQATDSTLLEKLHSQHANN-HFY 534  
 Myosin\_VI EGLGVNEVHYVDNQDCIDLIEAKLVGILDILDEENRLPQPSDQHFTSAVHQKHKDH-FRL 557  
 Myosin\_Va EQIPWTLIDFYDNQPCINLIESK-LGILDLLDEECKMPKGTDDTWAQKLYNTHLNKCALF 538  
 TgMyoF EGIQWNPLDFPDNADCVALLQEKPLGLFSMLDEECMVPAGKDRGFNNKVCQKHGGHKRFG 621  
 \* : : \* \* \* : \* : \* : \* : \* : \* : \* : \*

Myosin\_VII EKPRRS-----KNTFVVKHYAGEVHYDTQGF LDKNKDTVSSDLLSLLQGSKSKFI 532  
 Myosin\_X VKPRVA-----VNNFGVKHYAGEVQYDVRGILEKNRDTFRDDLNLRESRFDI 584  
 Myosin\_VI TIPRKSCLAVHRNIRDDEGFIIRHFAGAVCYETTQFVEKNNDALHMSLES LICESRDKFI 617  
 Myosin\_Va EKPRMS-----NKAFI IKHFADKVEYQCEGFLEKNKDTVFE EQIKVLKSSKFKML 588  
 TgMyoF VIKTKP-----NCFVHHFAGSVEYCS DGFLEKNKDQLSVDLQEA VKASTIPFV 670  
 . : \* : \* : \* \* : \* : \* : \* : \* : \*

Loop 2

Myosin\_VII IELFTIPP-----REEGDDSDKGREKKKTTAGQIFKTQLQSLIN 570  
 Myosin\_X YDLFEHVS-----SRNQDTLKC GSKHRRPTVSSQFKDSLHSLMA 624  
 Myosin\_VI RELFESS-----TNNKDTKQKAGKLSFISVGNKFKTQLNLLLD 656  
 Myosin\_Va PELFC DDEKAISPTSATSSGRTPLTRVPVKPTKGRPGQTAK EHKKT VGHQFRNSLHLLME 648  
 TgMyoF SNLFS AFL-----NRGTAEDGSGKKRKFVTVSSEFFREQLGALME 709  
 : \* : \* : \* : \* : \* : \* : \* : \*

Myosin\_VII ILSSTQPHYVRCIKPNTTKEPAVYDRELIQAQLRYAGMMETIRIRKLGYP I RHTHKEFRD 630  
 Myosin\_X TLSSSNPFFVRCIKPNTQKMPDQFDQVVVLNQLRYSGMLETVRIRKAGYAVRRPFQDFYK 684  
 Myosin\_VI KLRSTGASFIRCIPNLKMTSHHFEGAQIILSQLCQSGMVSVLDLDMQGGYPSRAS FHELYN 716  
 Myosin\_Va TLNATTPHYVRCIKPNDFKFPFTFDEKRAVQQLRACGVLETIRISAAGFP SRWTYQEFFS 708  
 TgMyoF TVDKTAPHFIRCIPNPQNL PDLFDRATVNEQLRYGGV LQAVQVSRAGY PVRLSHRDCFF 769  
 : : : \* \* \* \* \* : \* : \* : \* : \* : \* : \*

Myosin\_VII RYLILD-----YRARSTDHKQTCAGLINLLSGTGGLER-----DEWQLGNT 671  
 Myosin\_X RYKVLMR-----NLALPDDIRGKCTVLLQVYDASN-----SEWQLGKT 722  
 Myosin\_VI MYKKYMP-----DKLARLDPR LFCKALFKALGLNE-----NDYKFGLT 754  
 Myosin\_Va RYRVLMK-----QKDV LGDRKQTCCKNVLEKLILDK-----DKYQFGKT 746  
 TgMyoF DYRALADGALAAQLSQGTETPEAWRGRAEALLRHLDEK LKLD RRRKKE TDS PDRTWAVGKT 829  
 \* : . : \* : \* : \* : \* : \*

Myosin\_VII KV FIR 676  
 Myosin\_X KV FLR 727  
 Myosin\_VI KV FFR 759  
 Myosin\_Va KI FFR 751  
 TgMyoF LC FFK 834  
 \* : \*



**B**

|        |                      |                           |                          |                 |
|--------|----------------------|---------------------------|--------------------------|-----------------|
|        |                      | IQ-1                      |                          |                 |
| TgMyoF | KTLCFFKNEAYEILSANLMS | SVRVAAATAIEARYKCFVQRRFFL  | MYRQTVV 877              |                 |
| MyoVa  | KTKIFFRAGQVAYLEKLRAD | DKLRAACIRIQKTIRGWLLRKRYLC | MQRAAI 794               |                 |
|        | ** **:               | . ** . *: : : * : * :     | : : : : :                |                 |
|        |                      | IQ-2                      | IQ-3                     |                 |
| TgMyoF | FLQSHIRMF            | LCKLEAQR                  | LRESRAARRVENFMRGAVARLRY  | LRTLENIRRI 927  |
| MyoVa  | TVQRYVRGYQ           | ARCYAKFL                  | RRTKAATTIQKYWRMYVRRRY    | KIRRAATIVI 844  |
|        | : * : * :            | : . : * :                 | * * . : * * : * * * * :  | *               |
|        |                      | IQ-4                      | IQ-5                     |                 |
| TgMyoF | QAAWRGKQ             | TRSQLRDR                  | KLEEEAASKIQAFWKMHKQRMFYT | NLKKASTIAQL 977 |
| MyoVa  | QSYLRGYL             | TRNRYSKIL                 | REYKAVIIQKRVRGWLARTHVK   | RTMKAIVYLQC 894 |
|        | * : ** ** :          | * . :                     | * * * * : * . * . :      | ** . *          |
|        |                      | IQ-6                      |                          |                 |
| TgMyoF | KWKRI                | LARRMLRRLR                | 990                      |                 |
| MyoVa  | CFRRM                | MAKRELKCLK                | 907                      |                 |
|        | : : * : * :          | * : * :                   |                          |                 |

**C**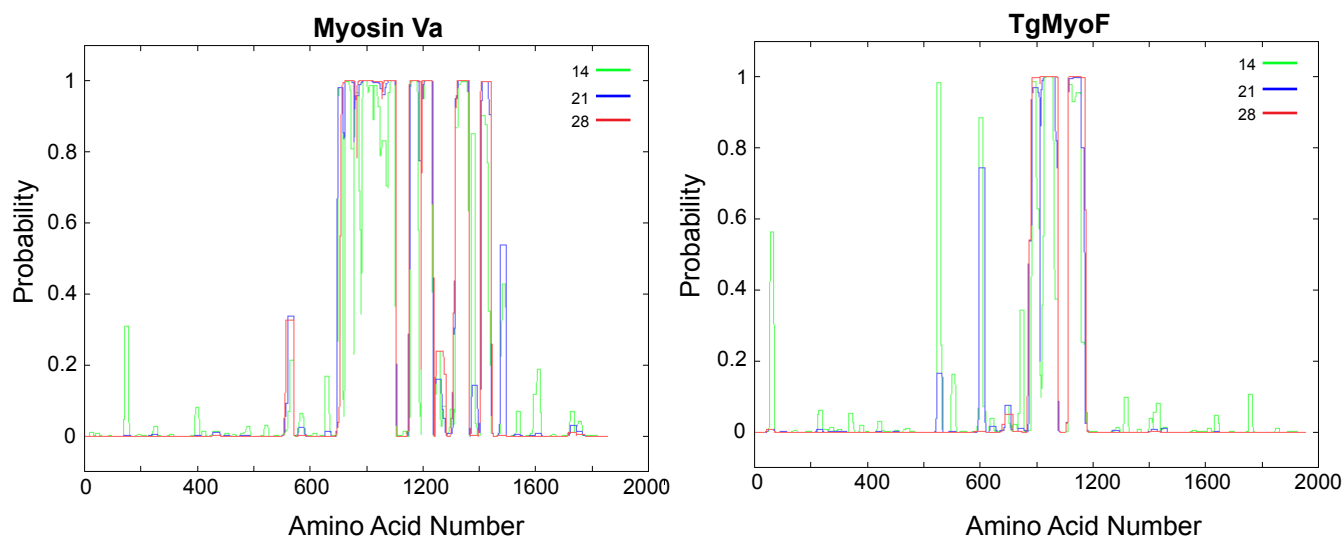

Figure S4

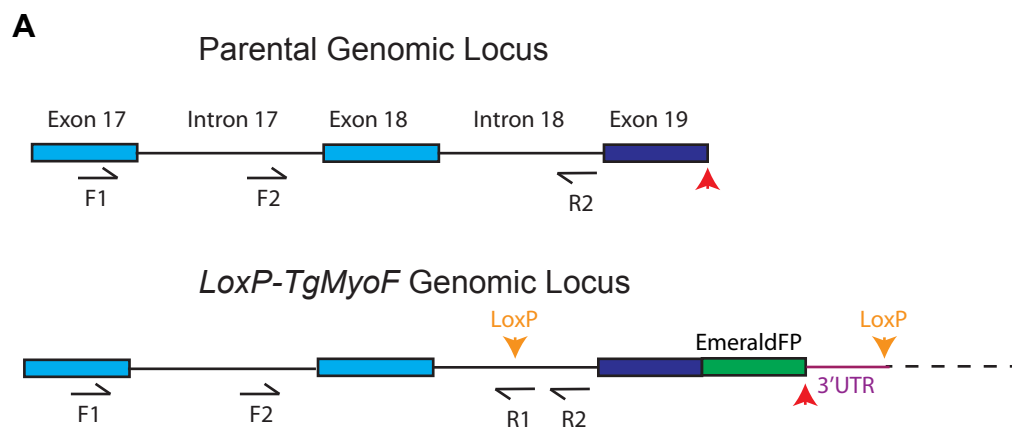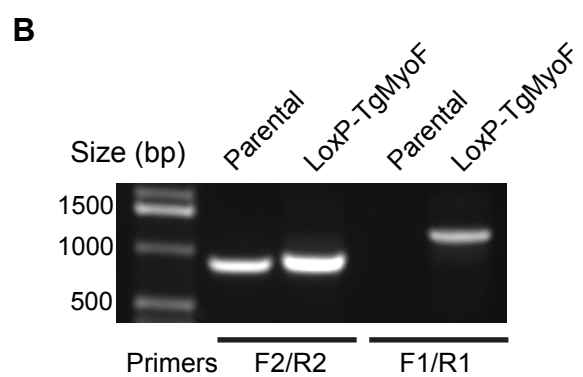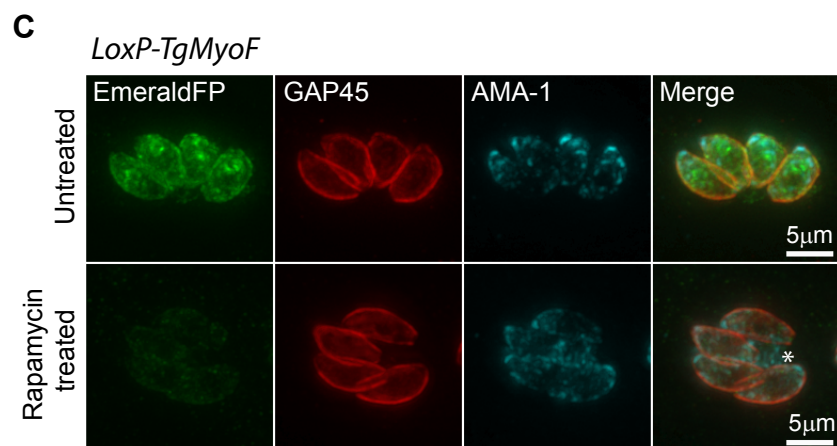

Figure S5

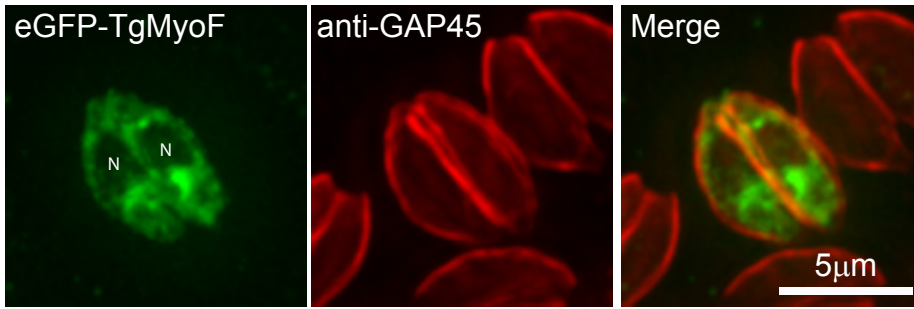

Figure S6

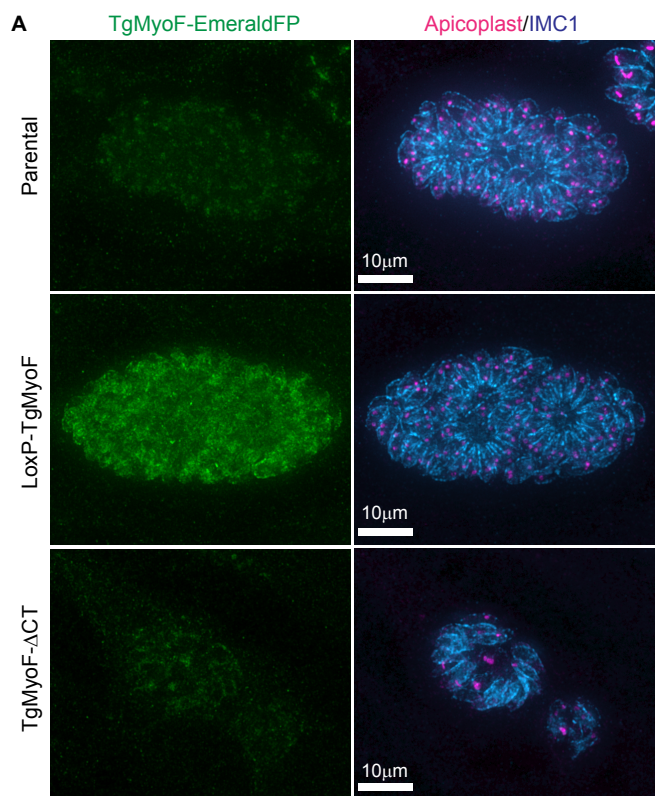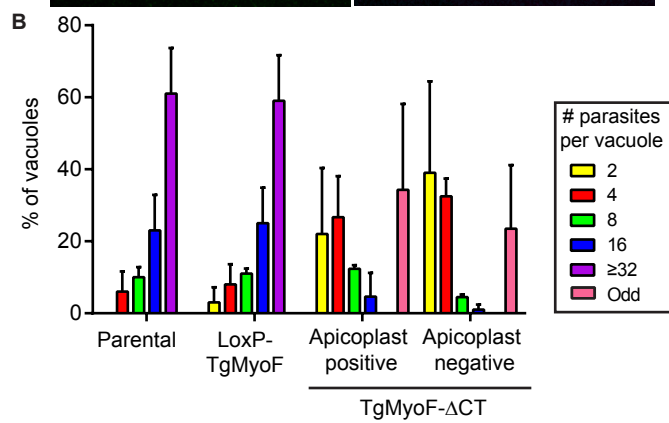

Figure S7

|                                                  | # Events | % Stationary | % Diffusive-like | % Directed | Run-length $\pm$ SEM (nm) | Velocity $\pm$ SEM (nm/s) | Diffusion Coefficient $\pm$ error (nm <sup>2</sup> /s) |
|--------------------------------------------------|----------|--------------|------------------|------------|---------------------------|---------------------------|--------------------------------------------------------|
| <b>Control</b>                                   | 201      | 11           | 50               | 39         | 715 $\pm$ 82              | 486 $\pm$ 19              | 3135 $\pm$ 110                                         |
| <b>Oryzalin</b>                                  | 277      | 4            | 54               | 42         | 604 $\pm$ 57              | 391 $\pm$ 19*             | 3032 $\pm$ 110                                         |
| <b>Cytochalasin D</b>                            | 80       | 46           | 53               | 1          | N/A                       | N/A                       | 835 $\pm$ 53**                                         |
| <b>Jasplakinolide</b>                            | 70       | 26           | 63               | 11         | 321 $\pm$ 130**           | 190 $\pm$ 12**            | 1586 $\pm$ 63**                                        |
| <b><i>LoxP Actin:</i><br/>Untreated</b>          | 392      | 15           | 48               | 37         | 622 $\pm$ 54              | 423 $\pm$ 13              | 2176 $\pm$ 91                                          |
| <b><i>LoxP Actin:</i><br/>Rapamycin Treated</b>  | 239      | 33           | 57               | 10         | 240 $\pm$ 64**            | 205 $\pm$ 18**            | 820 $\pm$ 71**                                         |
| <b><i>LoxP TgMyoF:</i><br/>Untreated</b>         | 122      | 32           | 61               | 7          | 813 $\pm$ 124             | 443 $\pm$ 22              | 2203 $\pm$ 107                                         |
| <b><i>LoxP TgMyoF:</i><br/>Rapamycin Treated</b> | 115      | 12           | 53               | 35         | 198 $\pm$ 66**            | 172 $\pm$ 9**             | 902 $\pm$ 61**                                         |

**Table S1: Summary of results.** Asterisks indicates that run-lengths, velocities and diffusion coefficients are significantly lower than control (\*\* =  $p < 0.001$ ) (\* =  $p < 0.05$ ).

| <b>Primer</b>   | <b>Sequence</b>                  |
|-----------------|----------------------------------|
| F1              | CGTCGTCGAGTGTATCTACGG            |
| F2              | ACTGAGAGTTTCTGTTTTTCCT           |
| R1              | TAATGTATGCTATACGAAGTTA           |
| R2              | AAGAAGCACTCGAGTCCATTC            |
| NheI-SAG1-F     | ATGCGCTAGCATGTTTCCGAAGGCAGTGAGAC |
| BglII-SAG1-287R | ATGCAGATCTTGCAGCCCCGGCAAACCTCCA  |
| TgMyoF qPCR F   | GGAGAGCGGAGCAGGCAAGACAGAAA       |
| TgMyoF qPCR R   | TCGGGGAAGGGAAGTAATAGATGC         |
| Tubulin qPCR F  | CGCCACGGCCGCTACCTGACT            |
| Tubulin qPCR R  | TACGCGCCTTCCTCTGCACCC            |

**Table S2. Primer sequences.** Restriction sites are underlined.
